# Supplementary material
Source: PubMed Central journal article supplement (PMC6640811)
Supplement: ao6b00119_si_001.pdf [file ao6b00119_si_001.pdf]

## Supporting Information

### **Design and Synthesis of a 4-Nitrobromobenzene Derivative bearing an Ethylene Glycol Tetraacetic acid Unit for a New Generation of Caged Calcium Compounds with Two-photon Absorption Properties in the Near-IR Region, and Their Application *In Vivo***

Satish Jakkampudi,<sup>1,2</sup> Manabu Abe,\*<sup>1,2</sup> Naomitsu Komori,<sup>1</sup> Ryukichi Takagi,<sup>1</sup> Ko Furukawa,<sup>3</sup> Claudine Katan,<sup>4</sup> Wakako Sawada,<sup>5</sup> Noriko Takahashi,<sup>5</sup> and Haruo Kasai\*<sup>2,5</sup>

<sup>1</sup>Department of Chemistry & Research Center for Future Science, Graduate School of Science, Hiroshima University, 1-3-1 Kagamiyama, Higashi-Hiroshima, Hiroshima 739-8526, Japan

<sup>2</sup>JST-CREST, Gobancho 7 K's Gabancho, Chiyodaku, Tokyo 102-0075, Japan

<sup>3</sup>Center for Instrumental Analysis, Institute for Research Promotion, Niigata University, 8050 Ikarashi 2-no-cho, Nishi-ku, Niigata 950-2181, Japan

<sup>4</sup>Institut des Sciences Chimiques de Rennes, UMR 6226 CNRS-Université Rennes 1, 35042 Rennes, France

<sup>5</sup>Laboratory of Structural Physiology, CDBIM, Graduate School of Medicine, The University of Tokyo, Bunkyo-ku, Tokyo 113-0033, Japan

mabe@hiroshima-u.ac.jp, [hkasai@m.u-tokyo.ac.jp](mailto:hkasai@m.u-tokyo.ac.jp)

#### **Contents**

#### **Page**

Product characterization

S2-S15

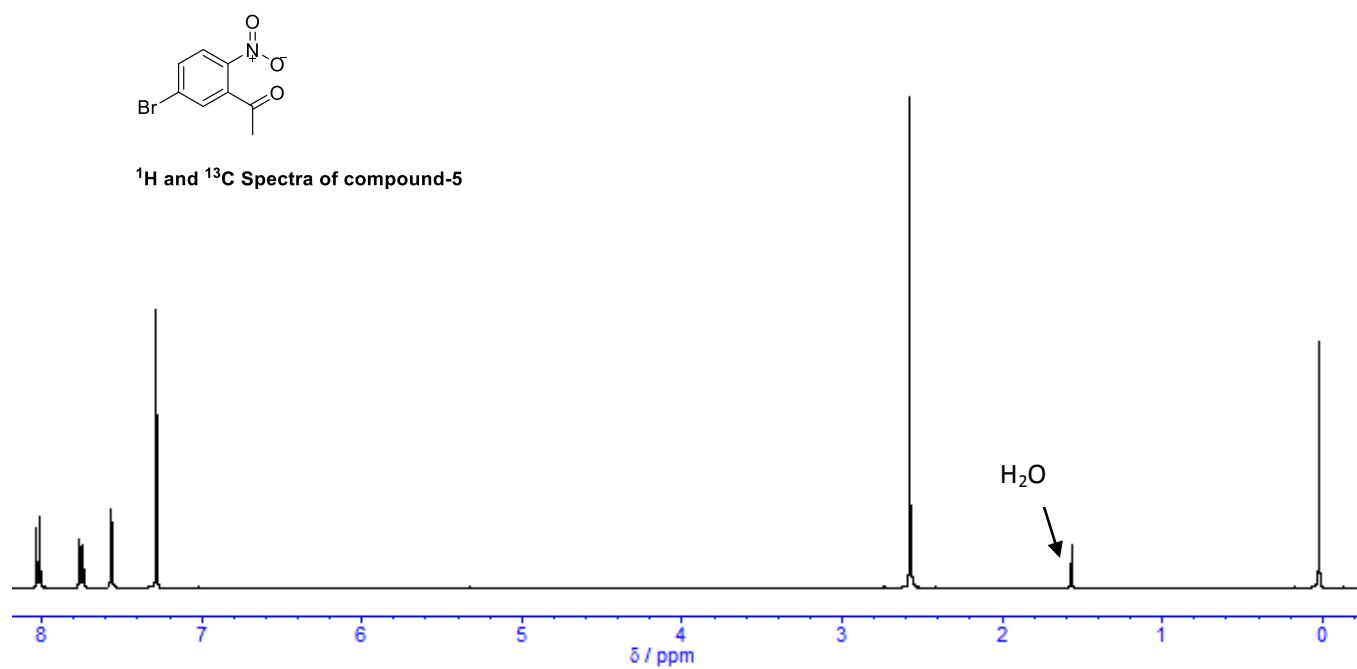

**Figure S1:** <sup>1</sup>H-NMR spectrum of compound **5** in CDCl<sub>3</sub>.

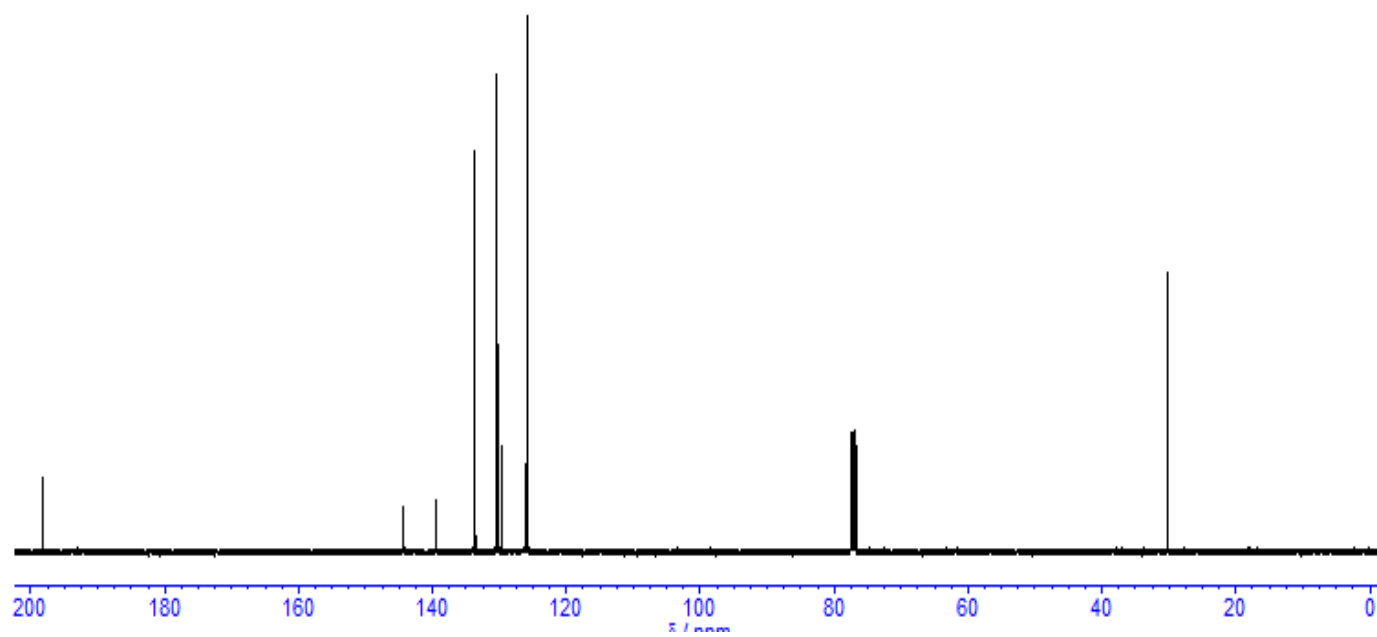

**Figure S2:** <sup>13</sup>C-NMR spectrum of compound **5** in CDCl<sub>3</sub>.

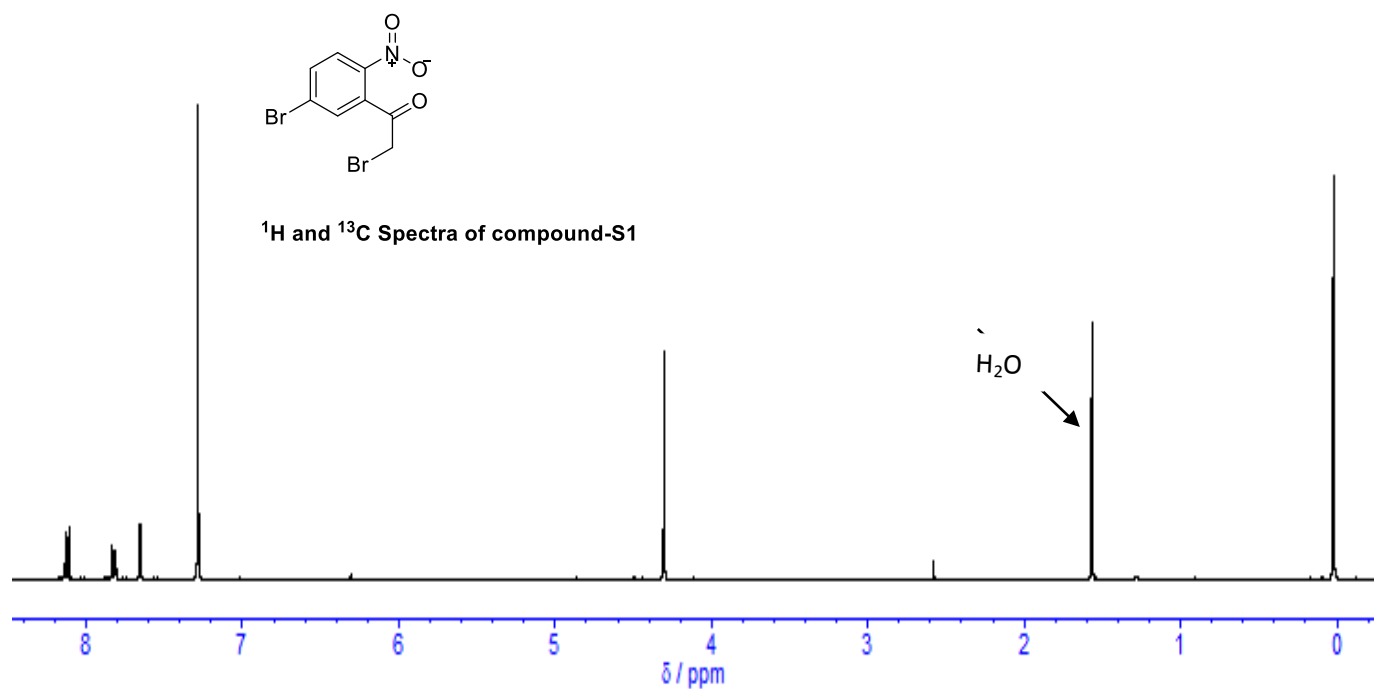

**Figure S3:** <sup>1</sup>H-NMR spectrum of compound **S1** in CDCl<sub>3</sub>.

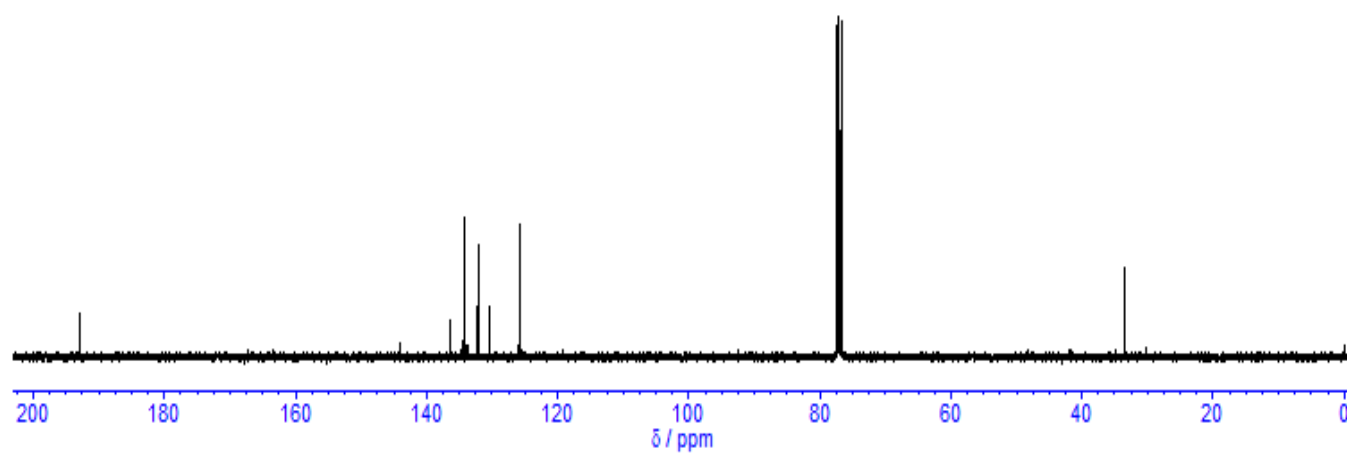

**Figure S4:** <sup>13</sup>C-NMR spectrum of compound **S1** in CDCl<sub>3</sub>.

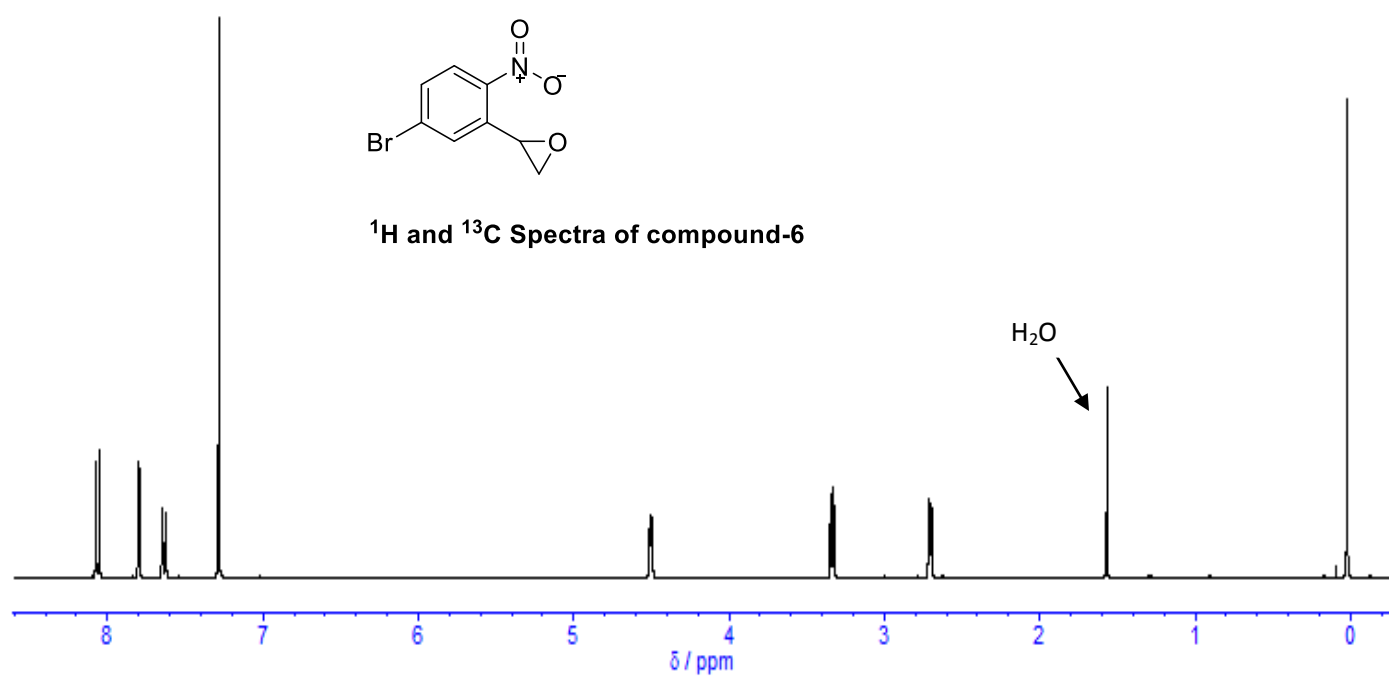

**Figure S5:** <sup>1</sup>H-NMR spectrum of compound **6** in CDCl<sub>3</sub>.

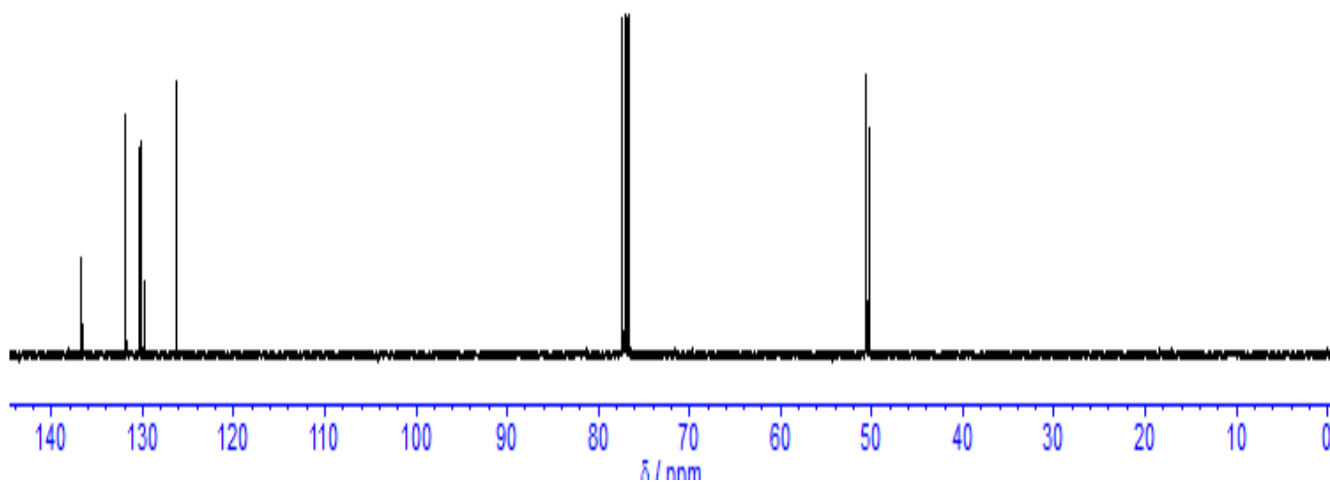

**Figure S6:** <sup>13</sup>C-NMR spectrum of compound **6** in CDCl<sub>3</sub>.

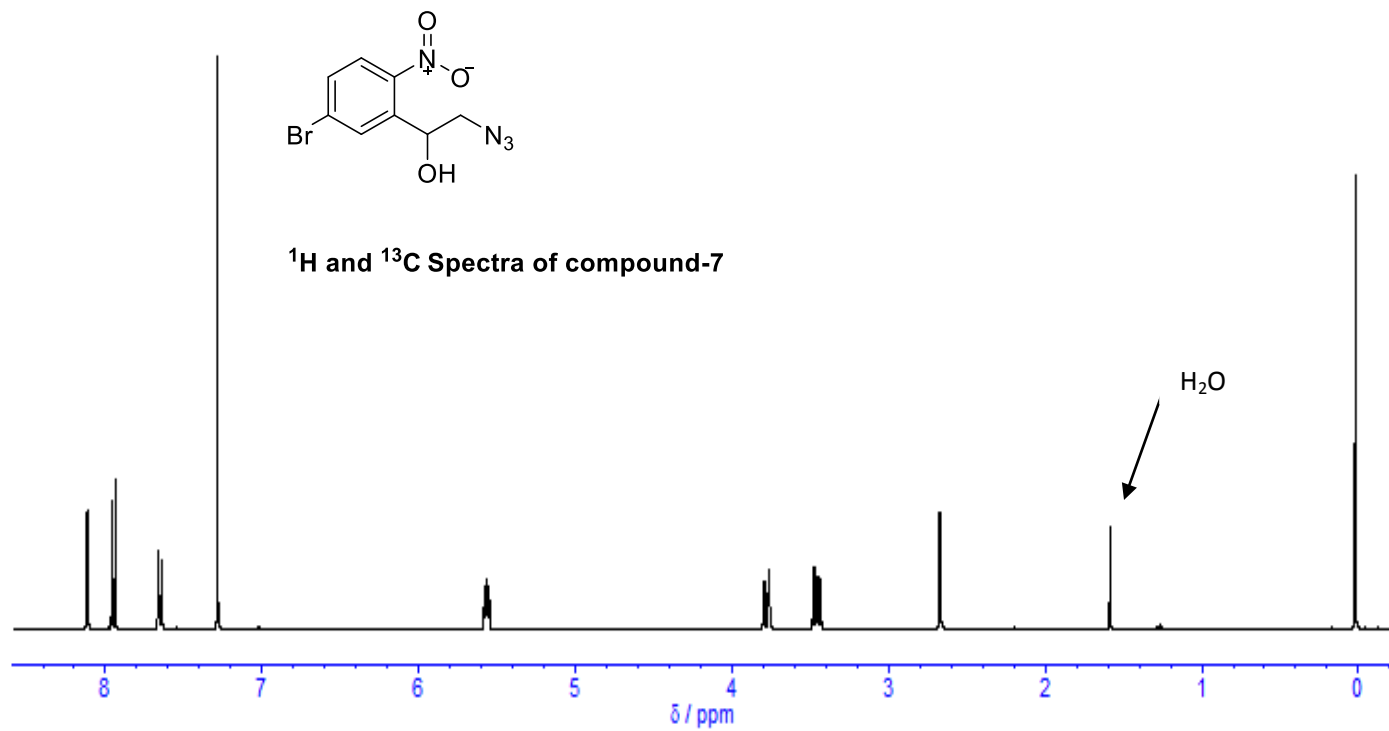

**Figure S7:** <sup>1</sup>H-NMR spectrum of compound **7** in CDCl<sub>3</sub>.

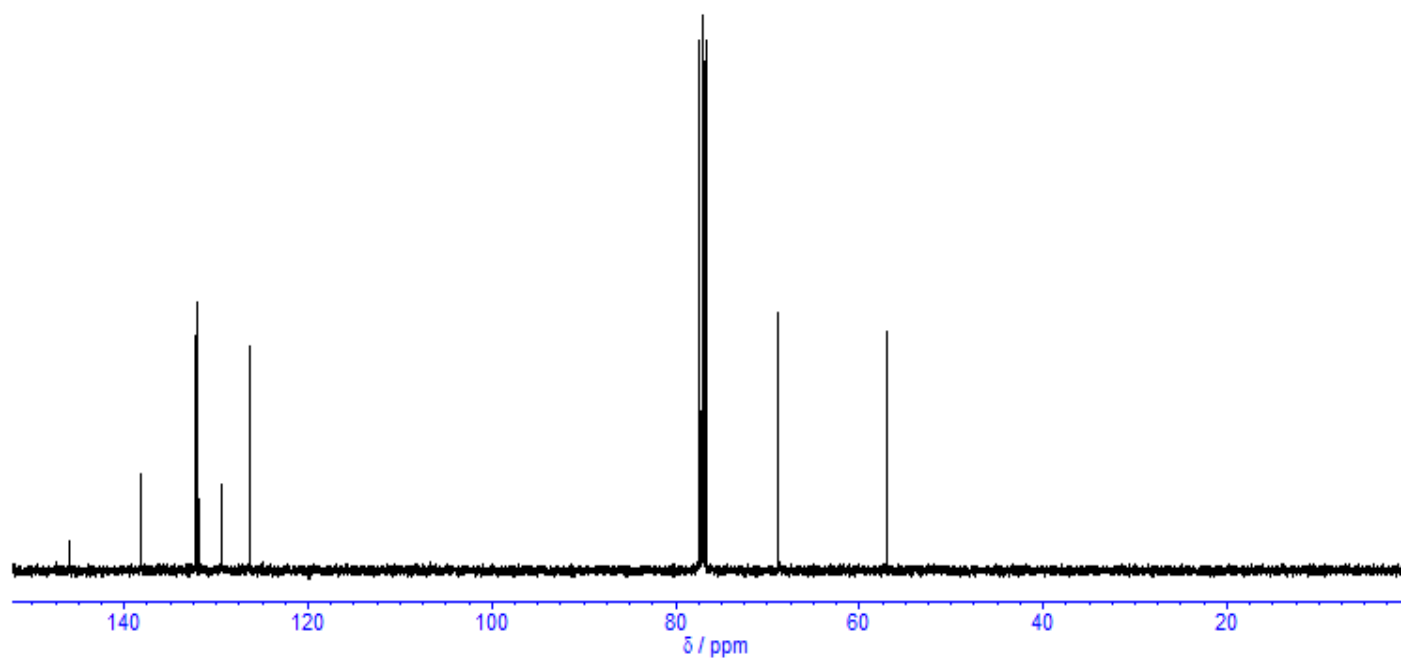

**Figure S8:** <sup>13</sup>C-NMR spectrum of compound **7** in CDCl<sub>3</sub>.

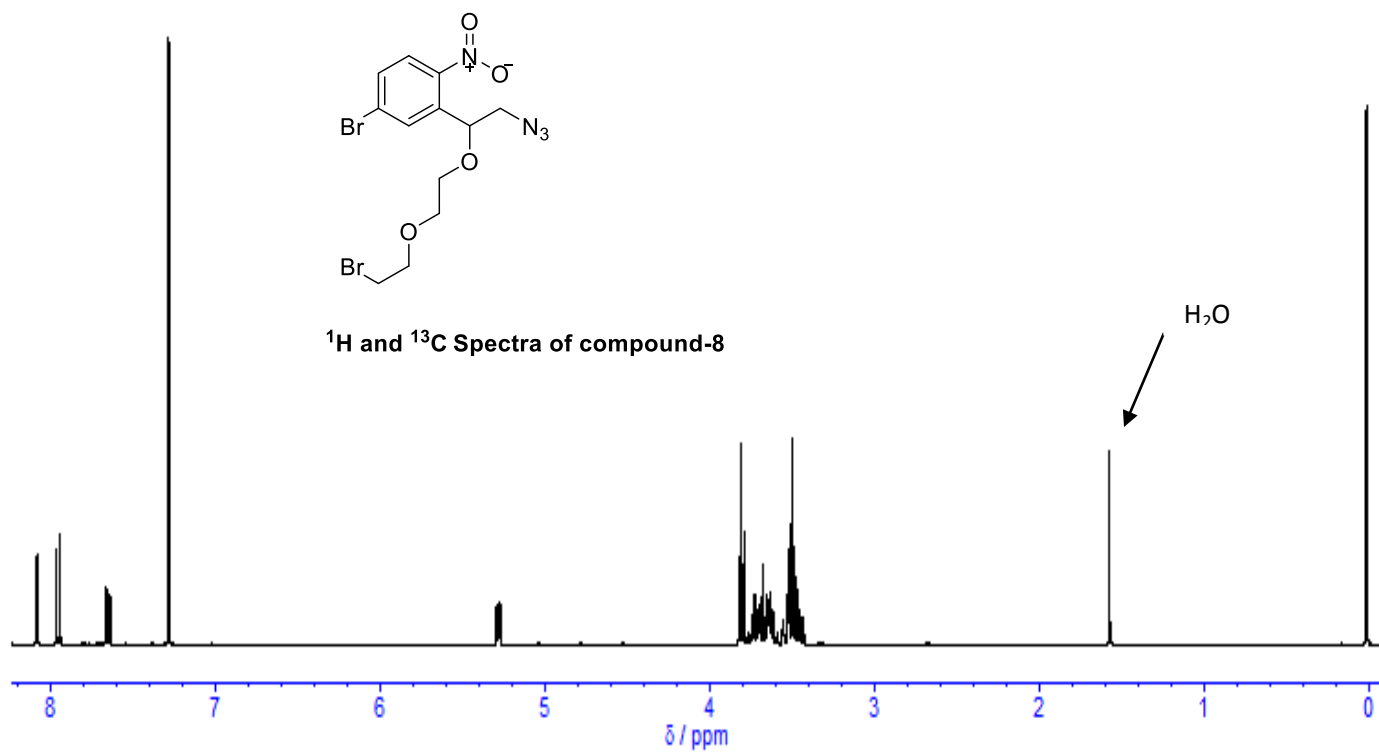

**Figure S9:** <sup>1</sup>H-NMR spectrum of compound **8** in CDCl<sub>3</sub>.

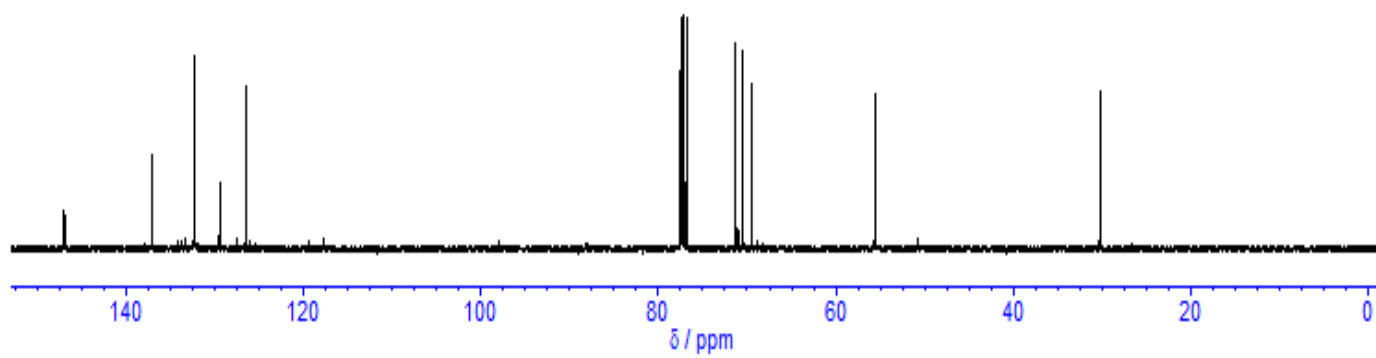

**Figure S10:** <sup>13</sup>C-NMR spectrum of compound **8** in CDCl<sub>3</sub>.

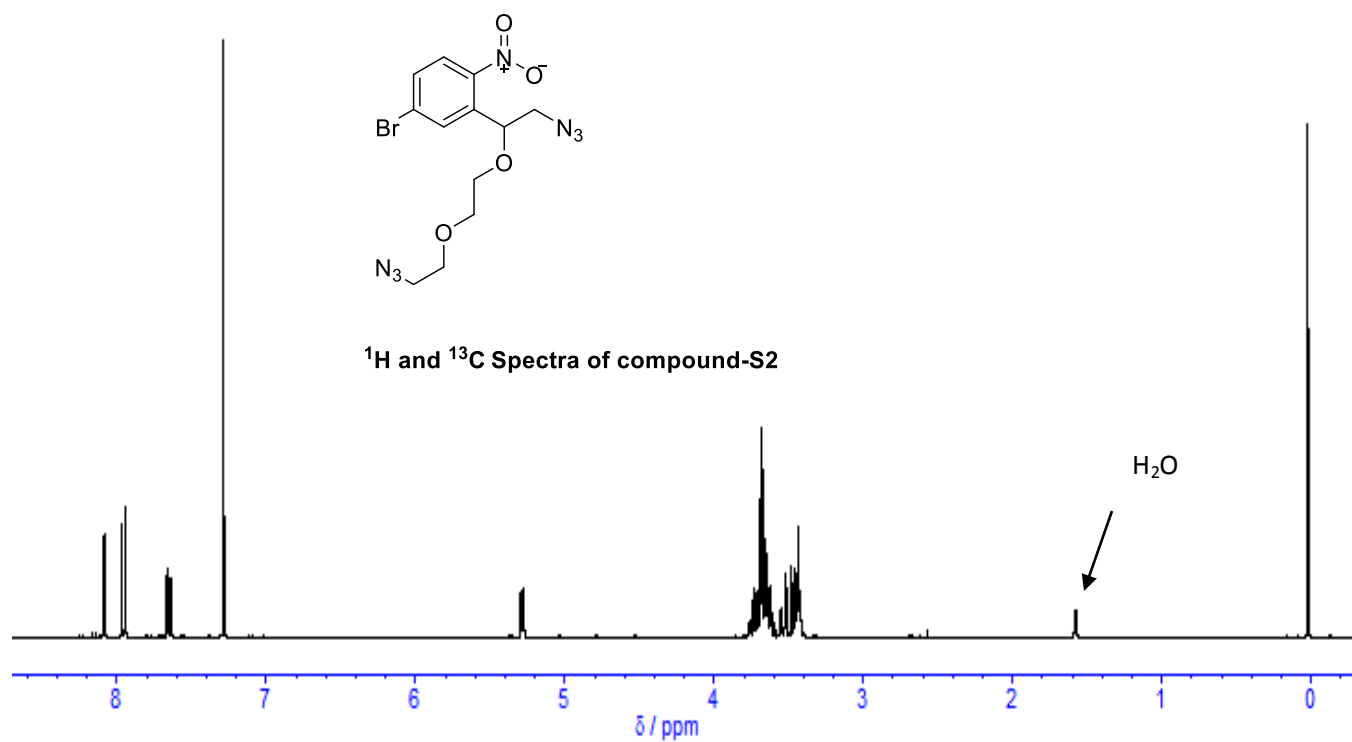

**Figure S11:** <sup>1</sup>H-NMR spectrum of compound **S2** in CDCl<sub>3</sub>.

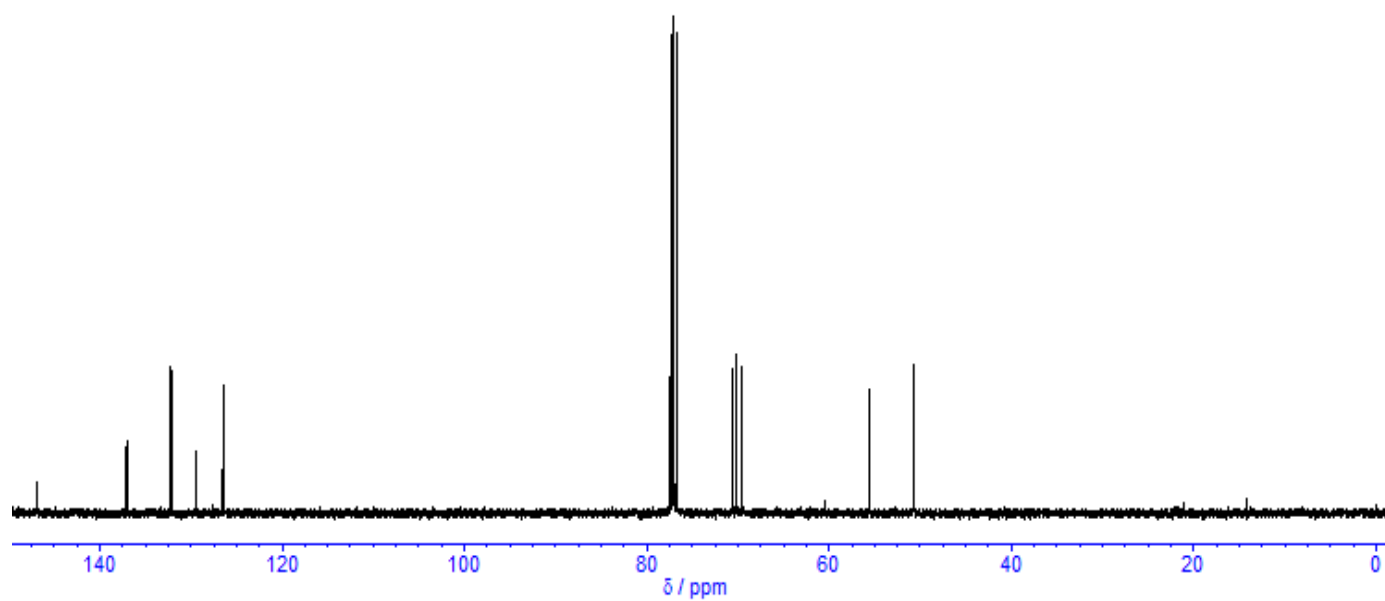

**Figure S12:** <sup>13</sup>C-NMR spectrum of compound **S2** in CDCl<sub>3</sub>.

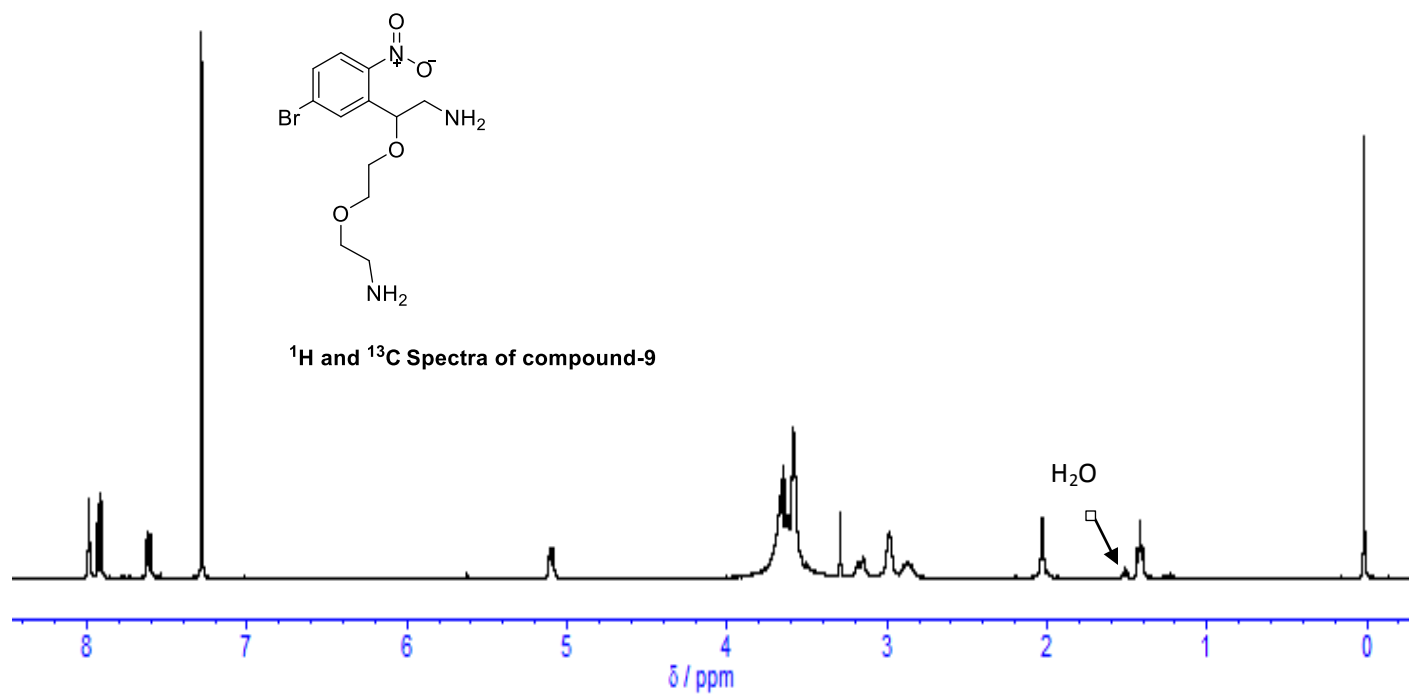

**Figure S13:** <sup>1</sup>H-NMR spectrum of compound **9** in CDCl<sub>3</sub>.

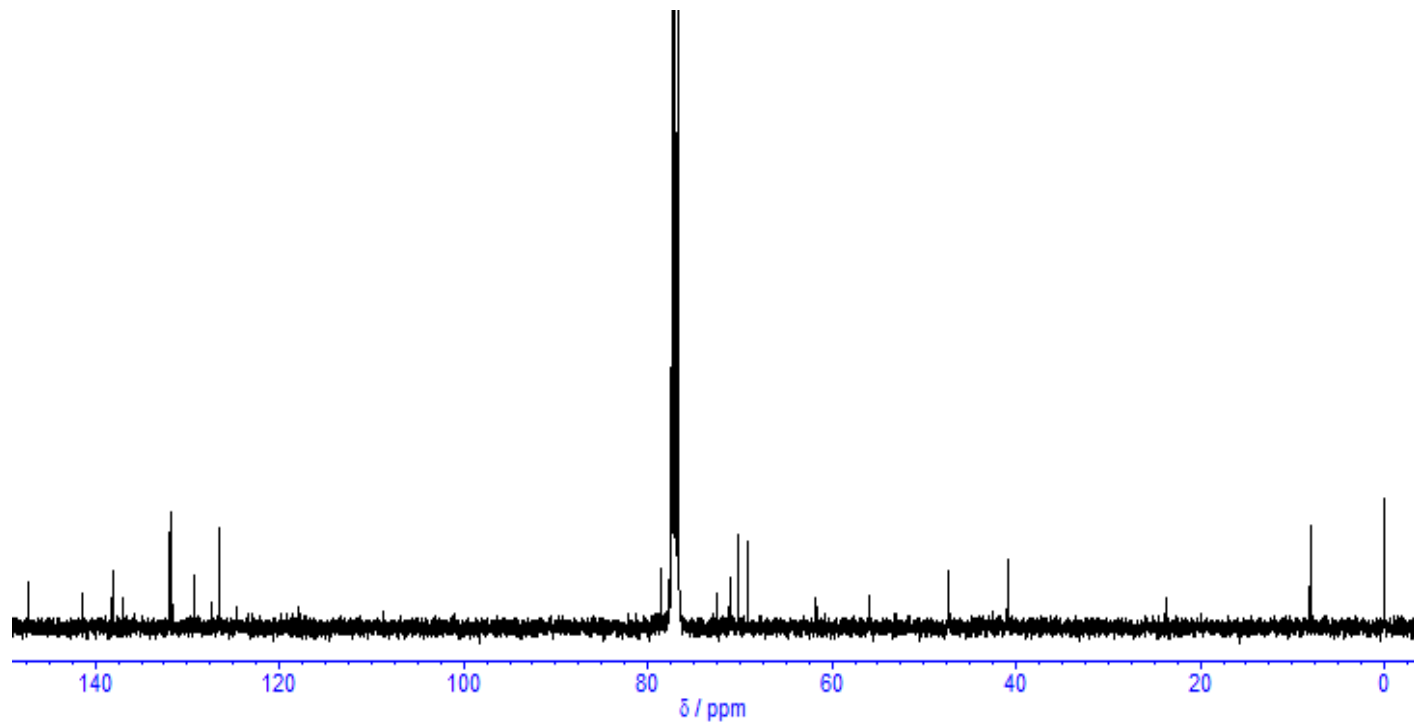

**Figure S14:** <sup>13</sup>C-NMR spectrum of compound **9** in CDCl<sub>3</sub>.

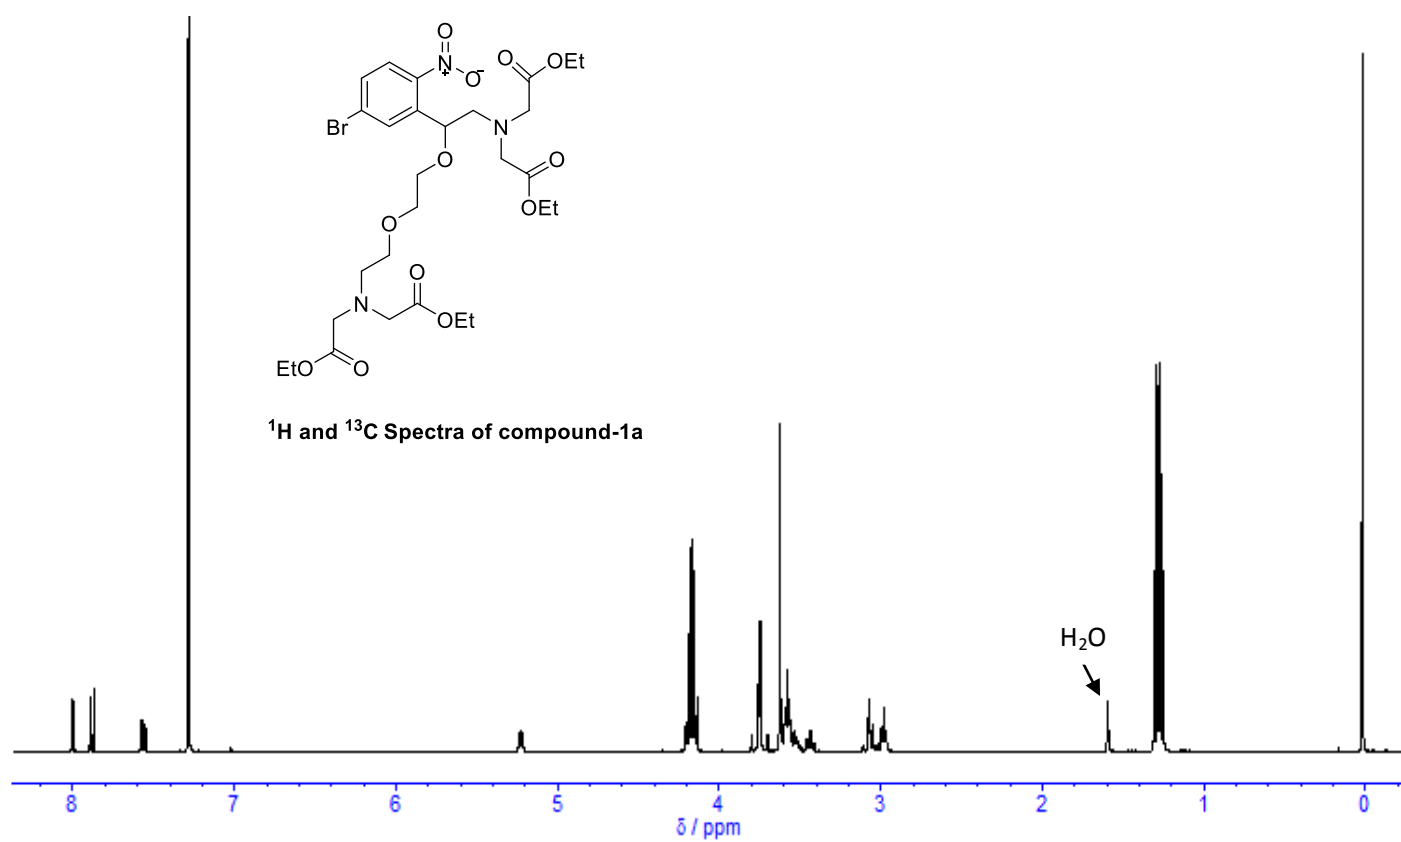

**Figure S15:** <sup>1</sup>H-NMR spectrum of compound **1a** in CDCl<sub>3</sub>.

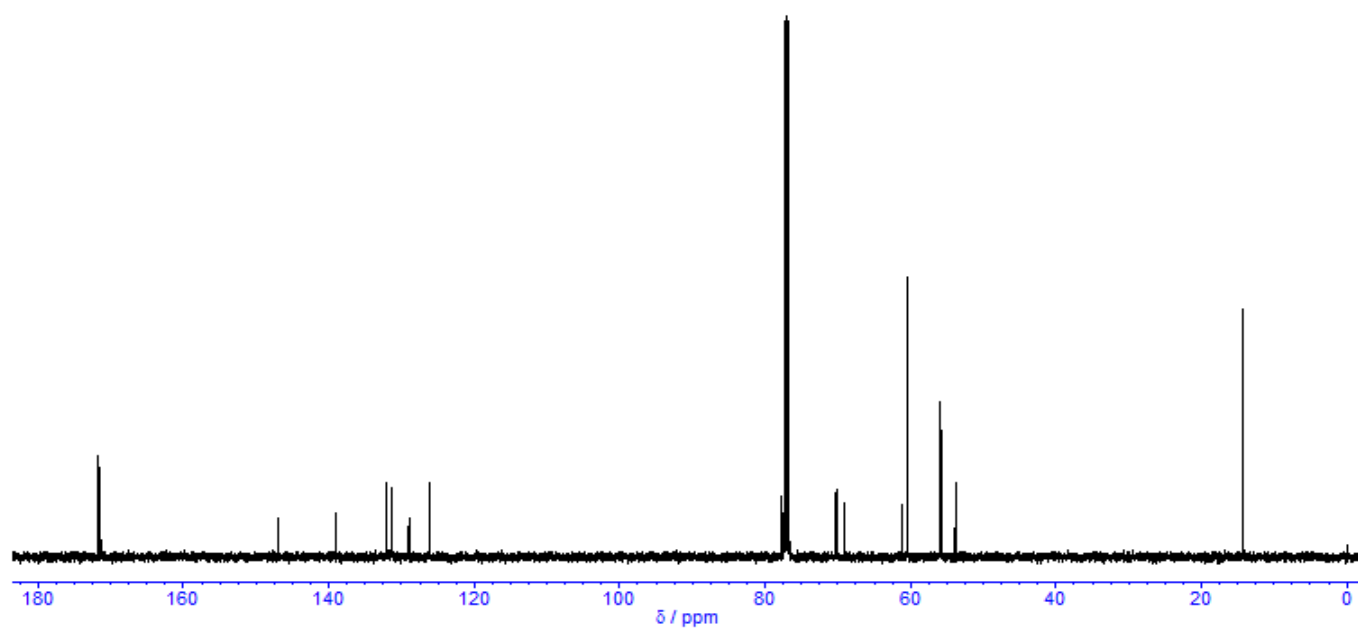

**Figure S16:** <sup>13</sup>C-NMR spectrum of compound **1a** in CDCl<sub>3</sub>.

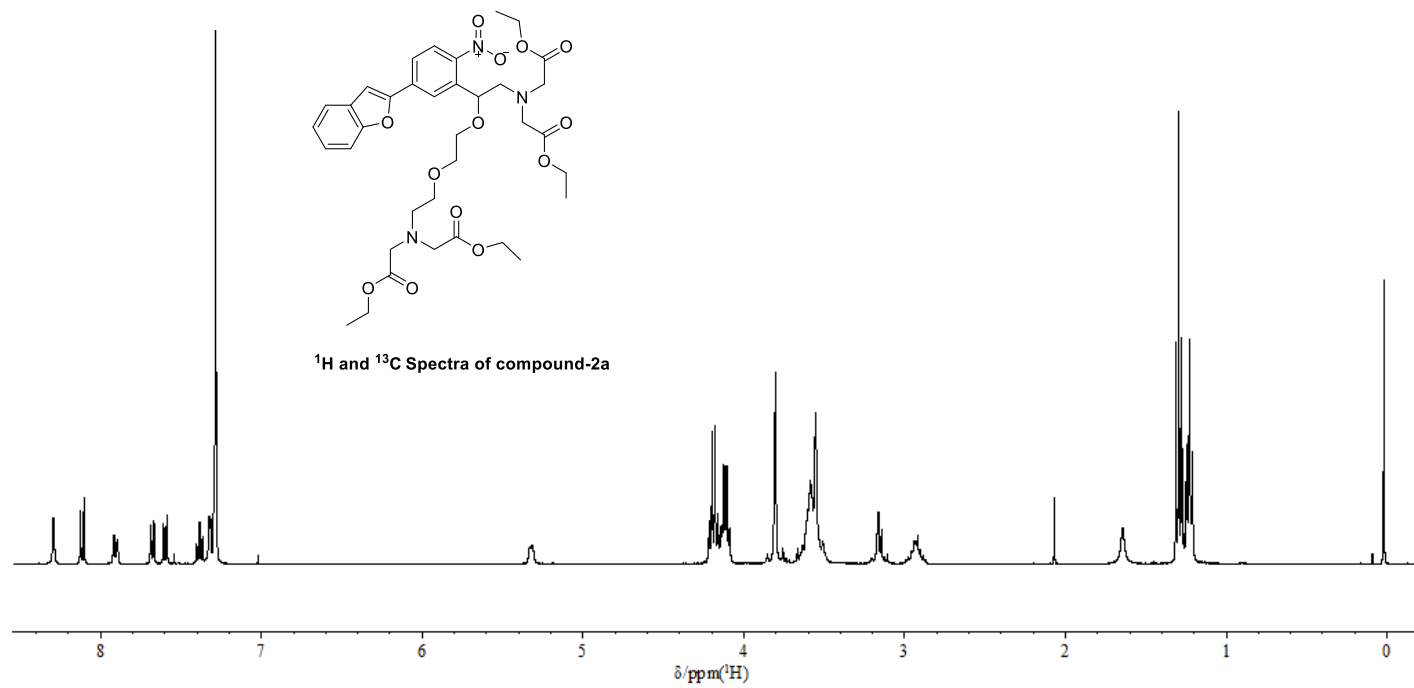

**Figure S17:** <sup>1</sup>H-NMR spectrum of compound **2a** in CDCl<sub>3</sub>.

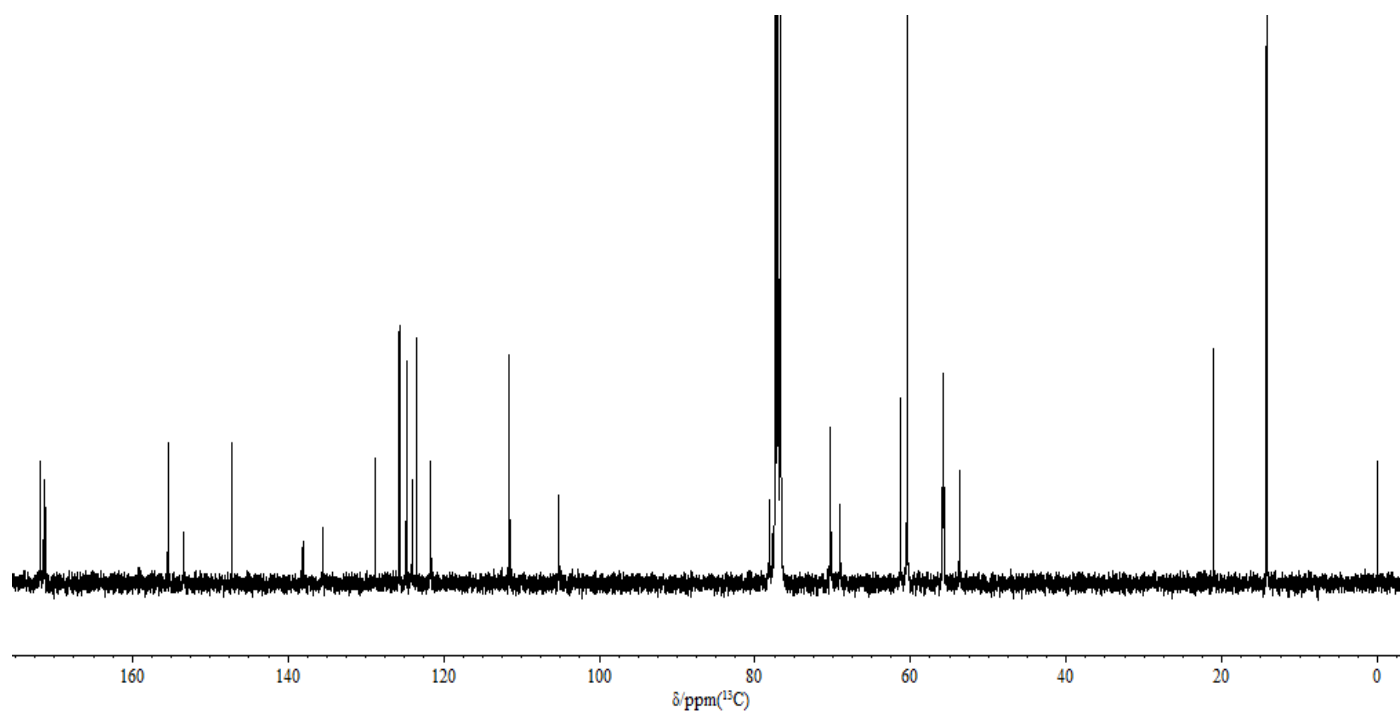

**Figure S18:** <sup>13</sup>C-NMR spectrum of compound **2a** in CDCl<sub>3</sub>.

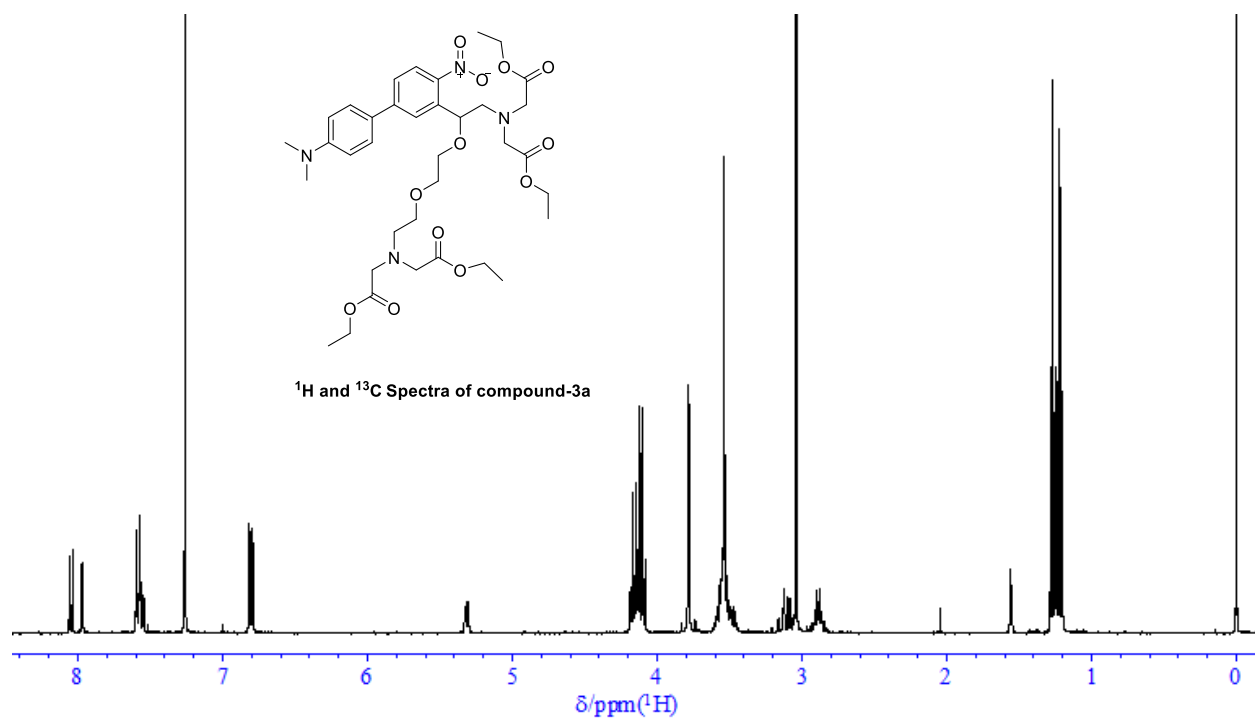

**Figure S19:** <sup>1</sup>H-NMR spectrum of compound **3a** in CDCl<sub>3</sub>.

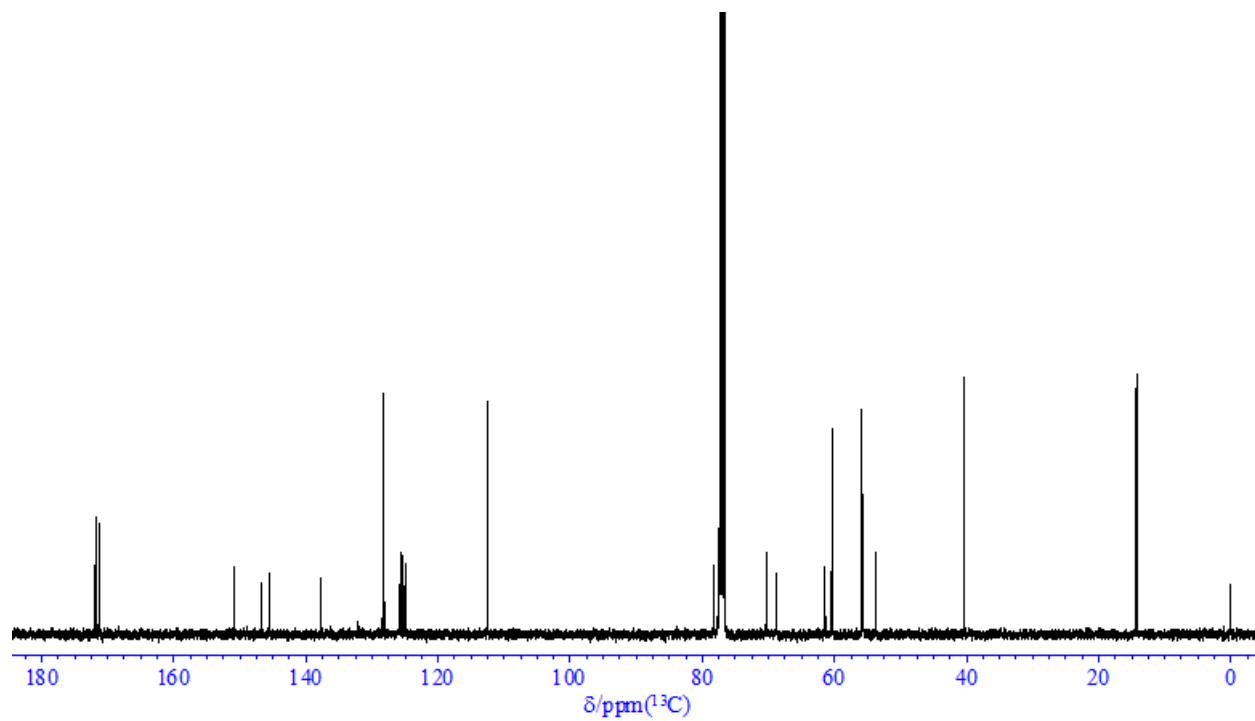

**Figure S20:** <sup>13</sup>C-NMR spectrum of compound **3a** in CDCl<sub>3</sub>.

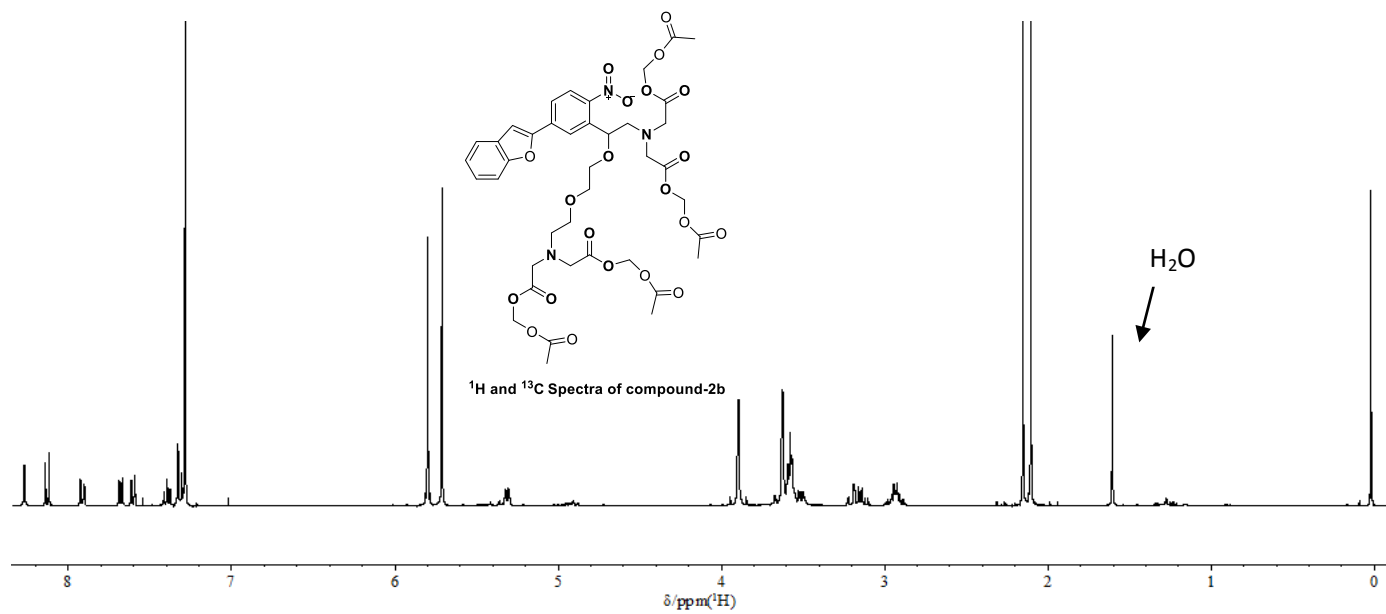

**Figure S21:** <sup>1</sup>H-NMR spectrum of compound **2b** in CDCl<sub>3</sub>.

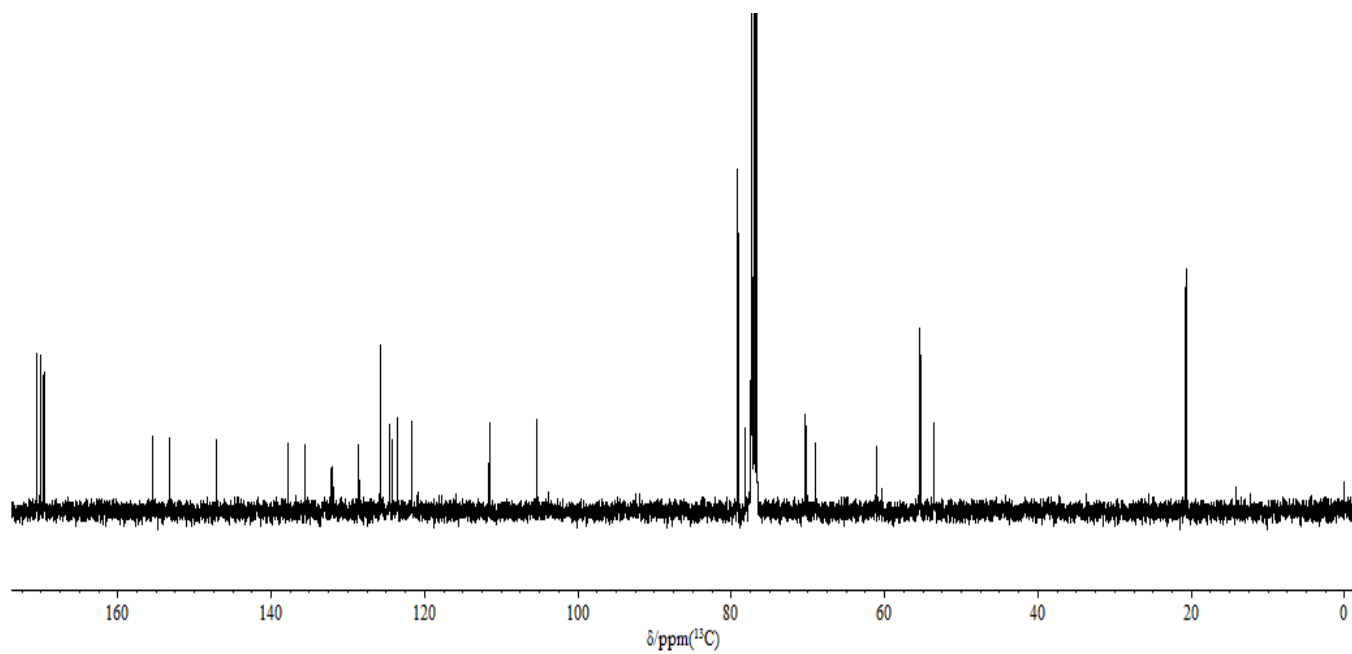

**Figure S22:** <sup>13</sup>C-NMR spectrum of compound **2b** in CDCl<sub>3</sub>.

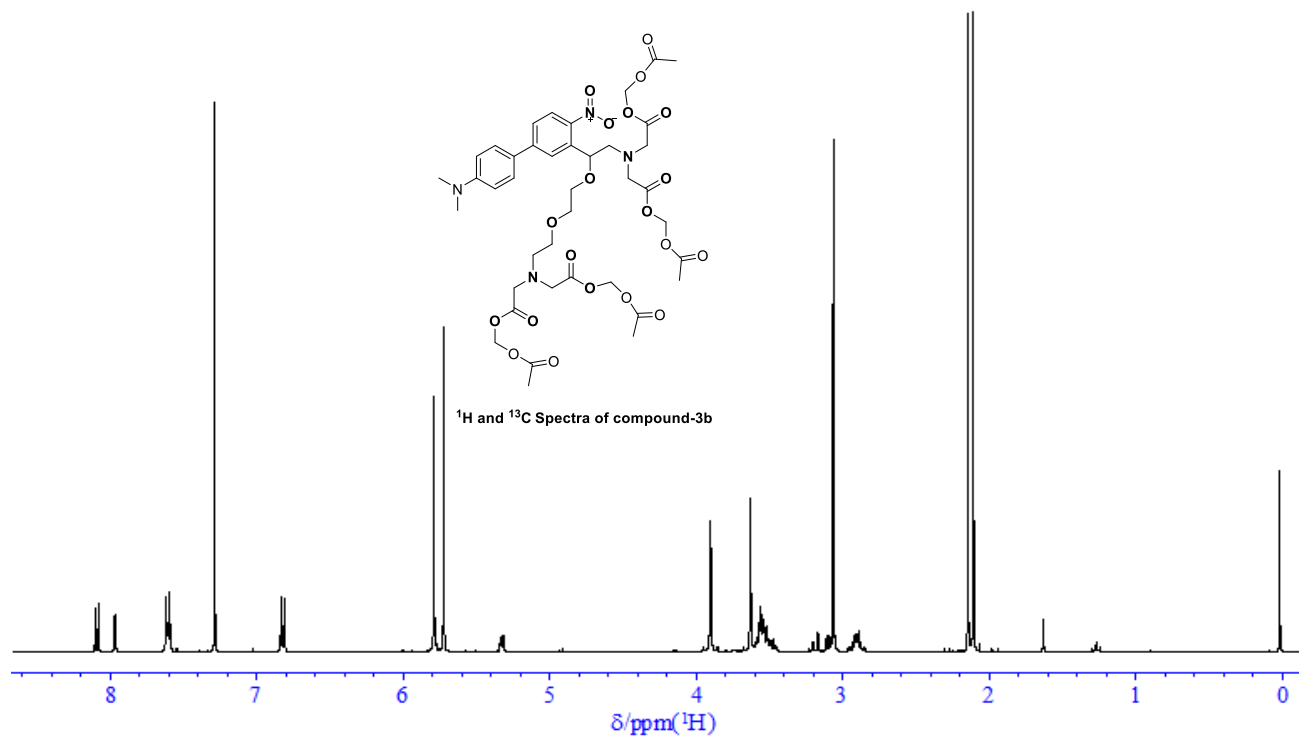

**Figure S23:** <sup>1</sup>H-NMR spectrum of compound **3b** in CDCl<sub>3</sub>.

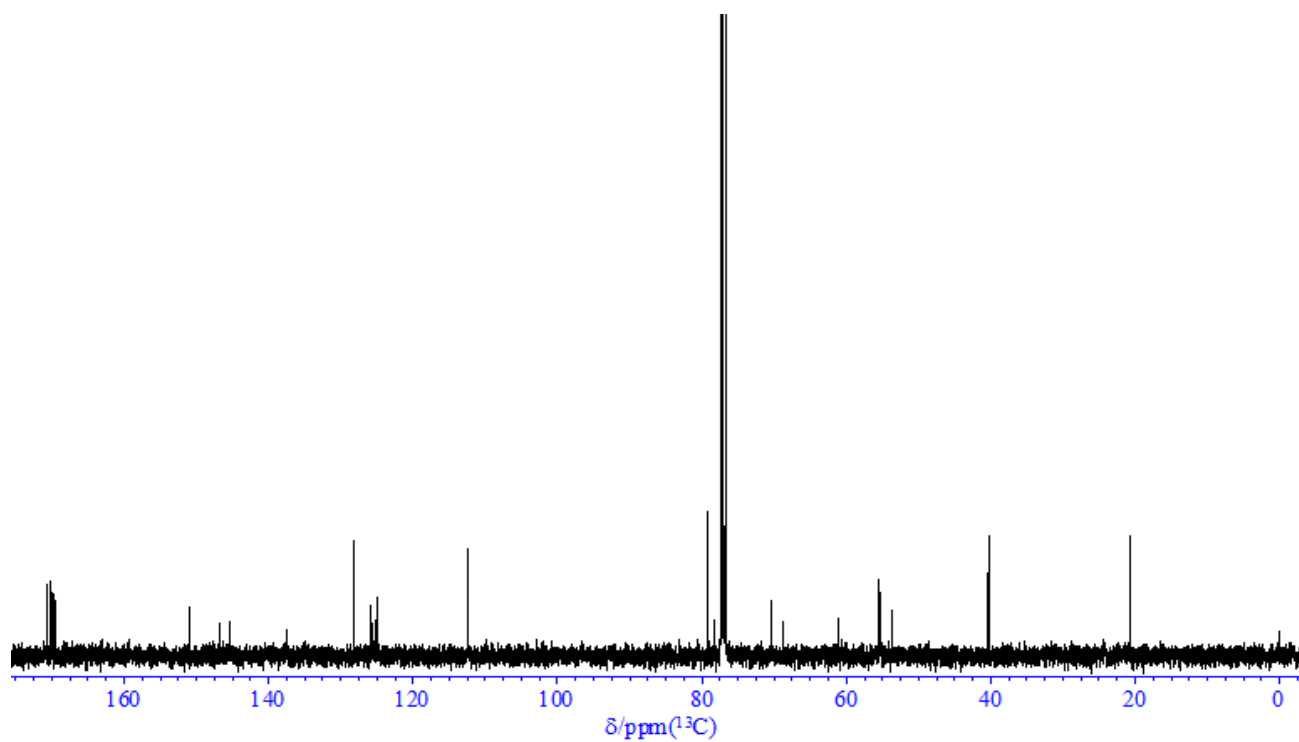

**Figure S24:** <sup>13</sup>C-NMR spectrum of compound **3b** in CDCl<sub>3</sub>.

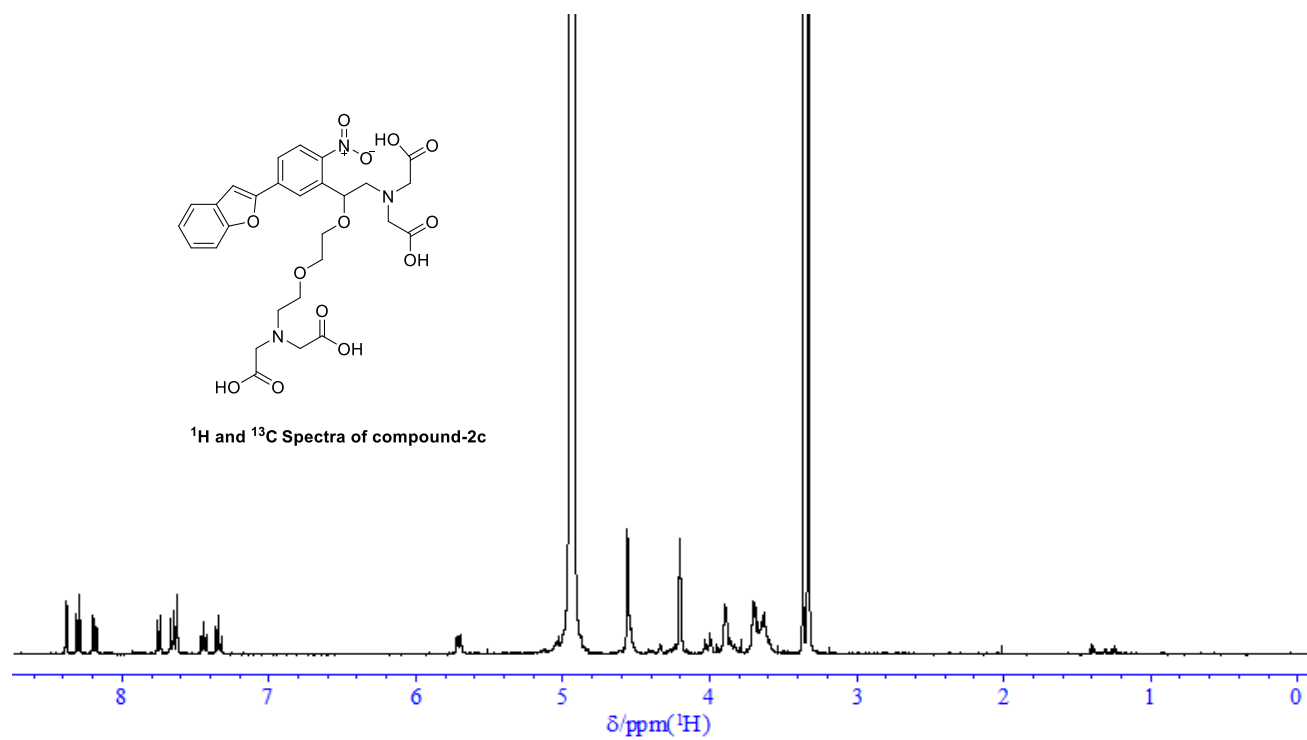

**Figure S25:**  $^1\text{H}$ -NMR spectrum of compound **2c** in  $\text{CD}_3\text{OD}$ .

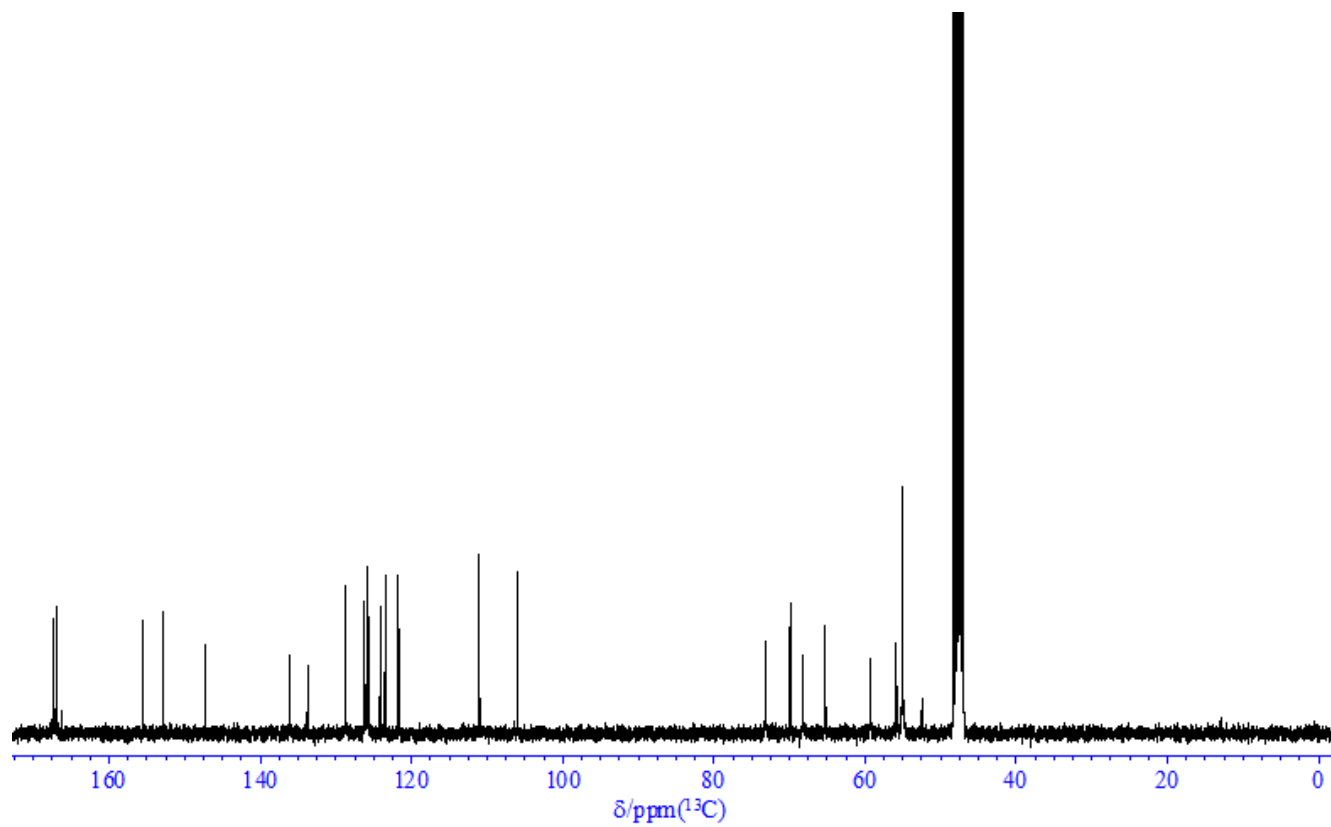

**Figure S26:**  $^{13}\text{C}$ -NMR spectrum of compound **2c** in  $\text{CD}_3\text{OD}$ .

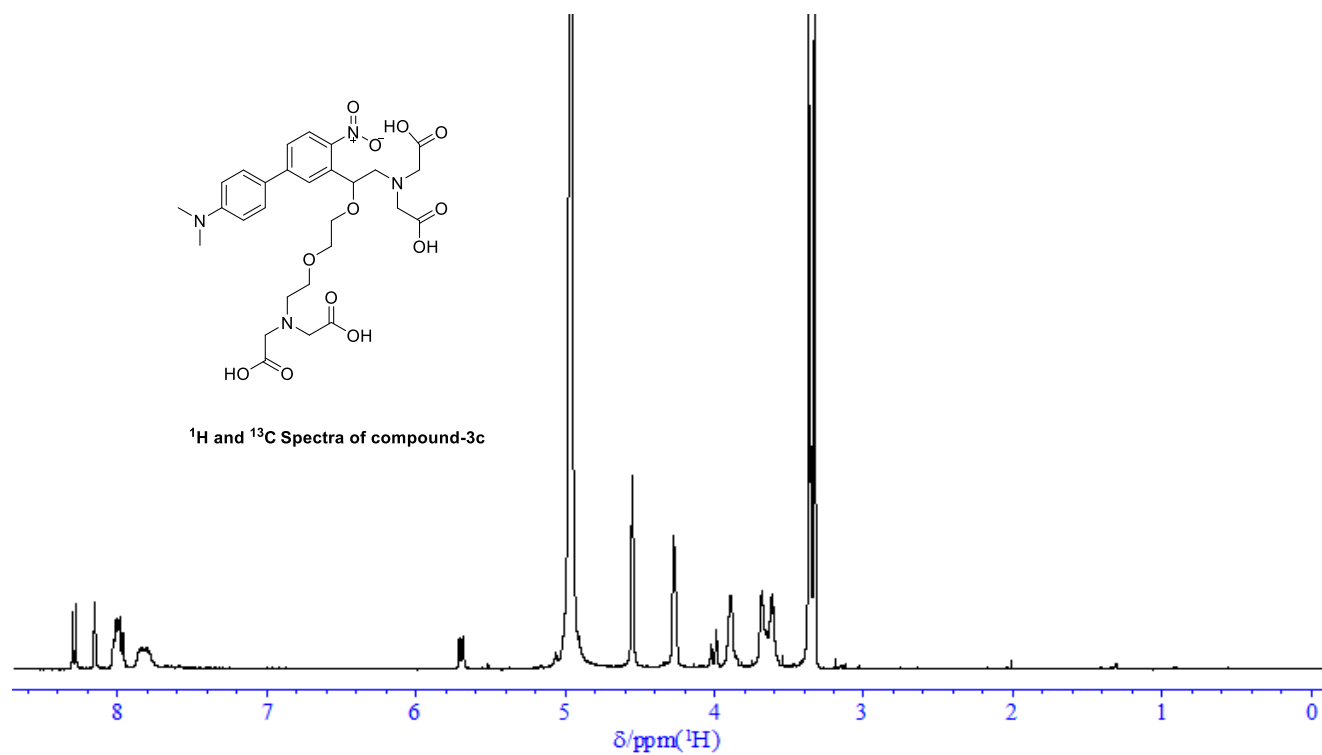

**Figure S27:** <sup>1</sup>H-NMR spectrum of compound **3c** in CD<sub>3</sub>OD.

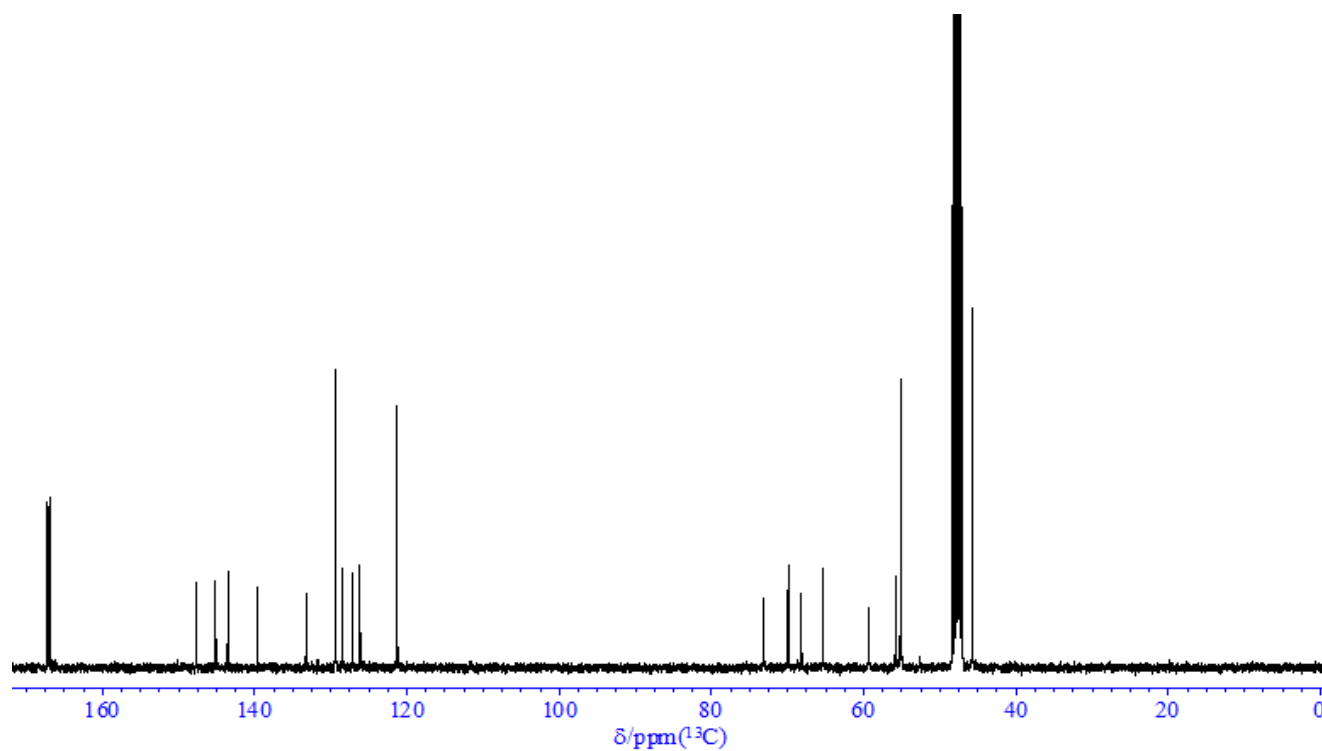

**Figure S28:** <sup>13</sup>C-NMR spectrum of compound **3c** in CD<sub>3</sub>OD.
